# Supplementary material
Source: PubMed Central journal article supplement (PMC3568499)

# Supplementary figure 1

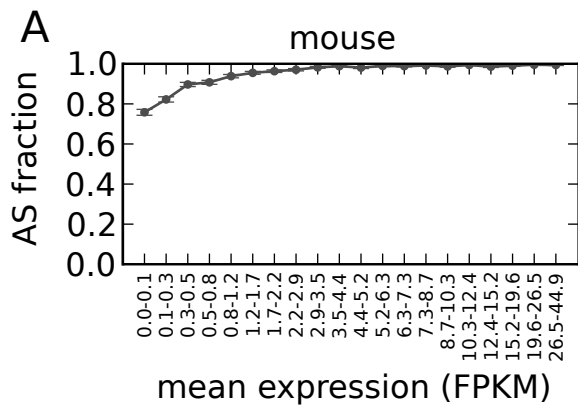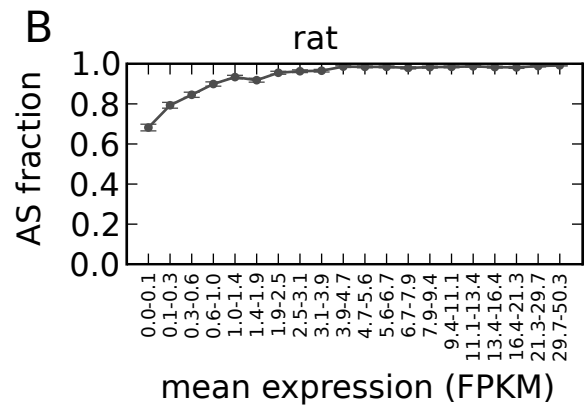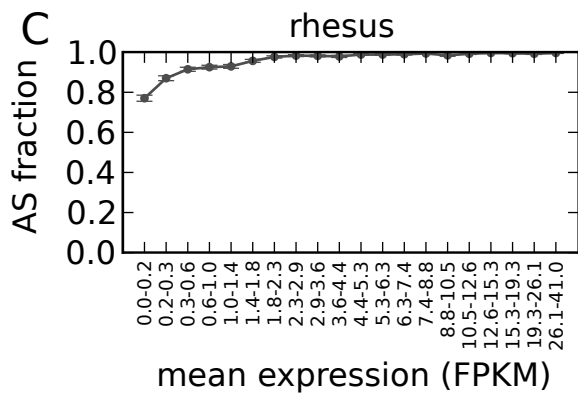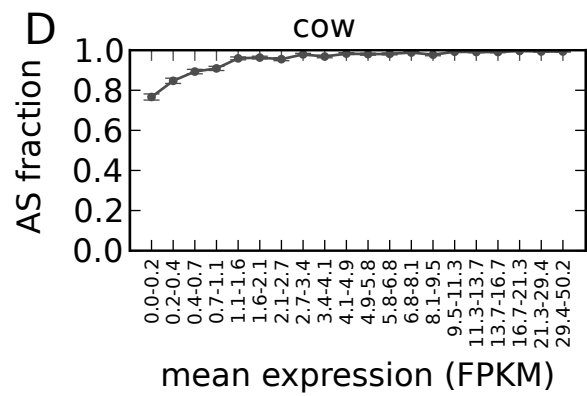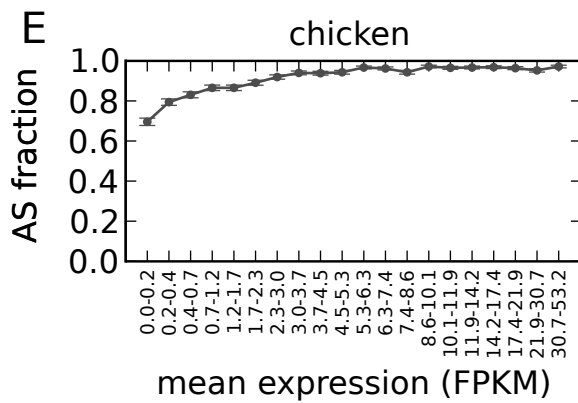

Supplementary figure 2

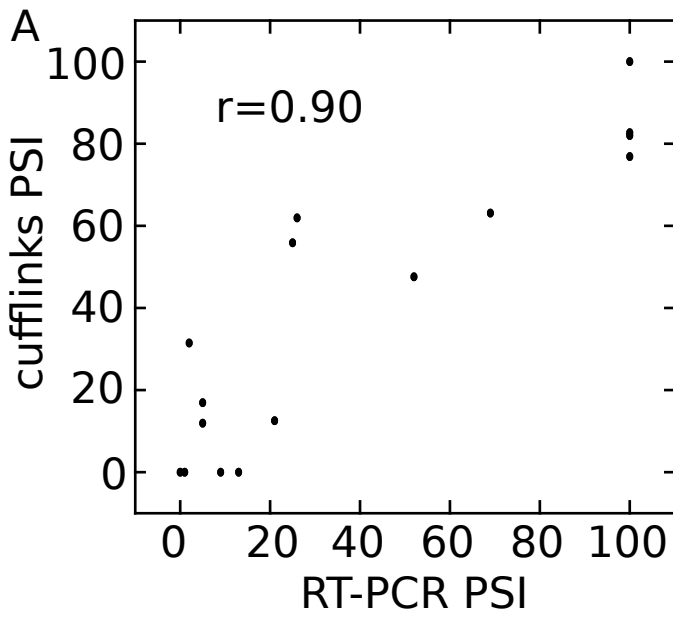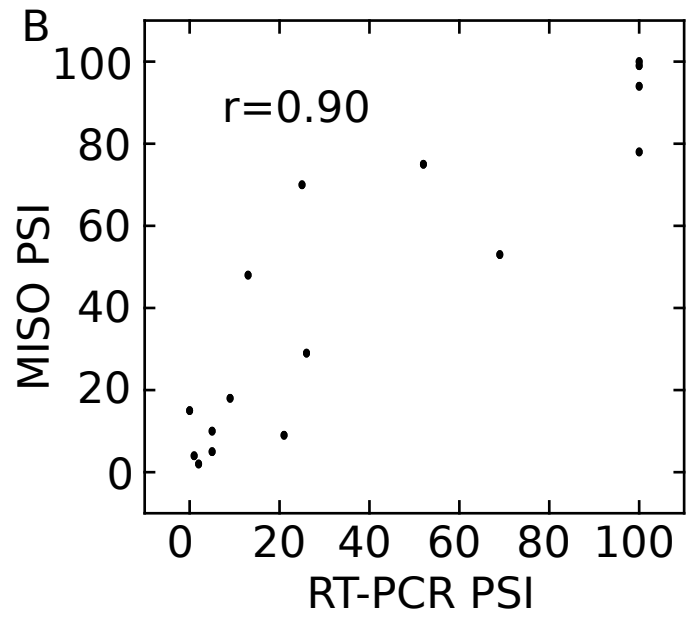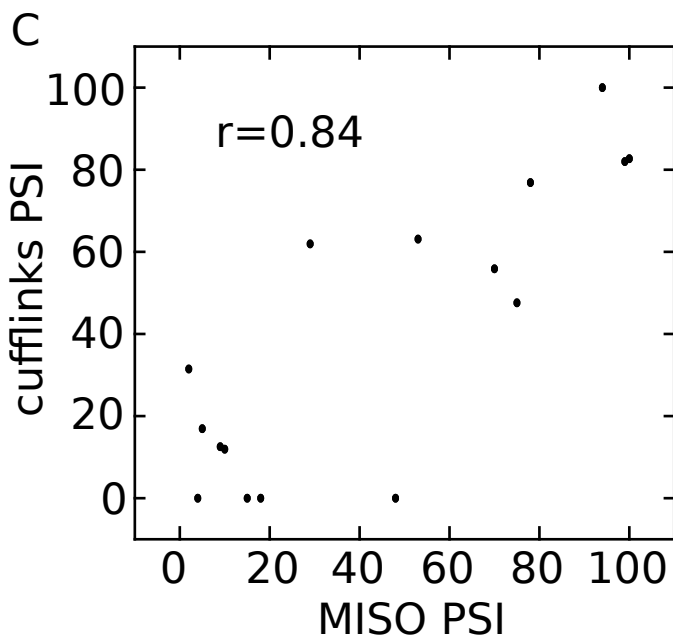

# Supplementary figure 3

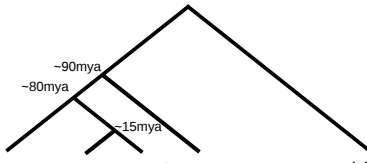

**A** min FPKM 10

by species: ■ rhesus ■ mouse ■ rat ■ cow ■ chicken  
 by tissue: ■ brain ■ colon ■ heart ■ kidney ■ liver ■ lung ■ muscle ■ spleen ■ testes

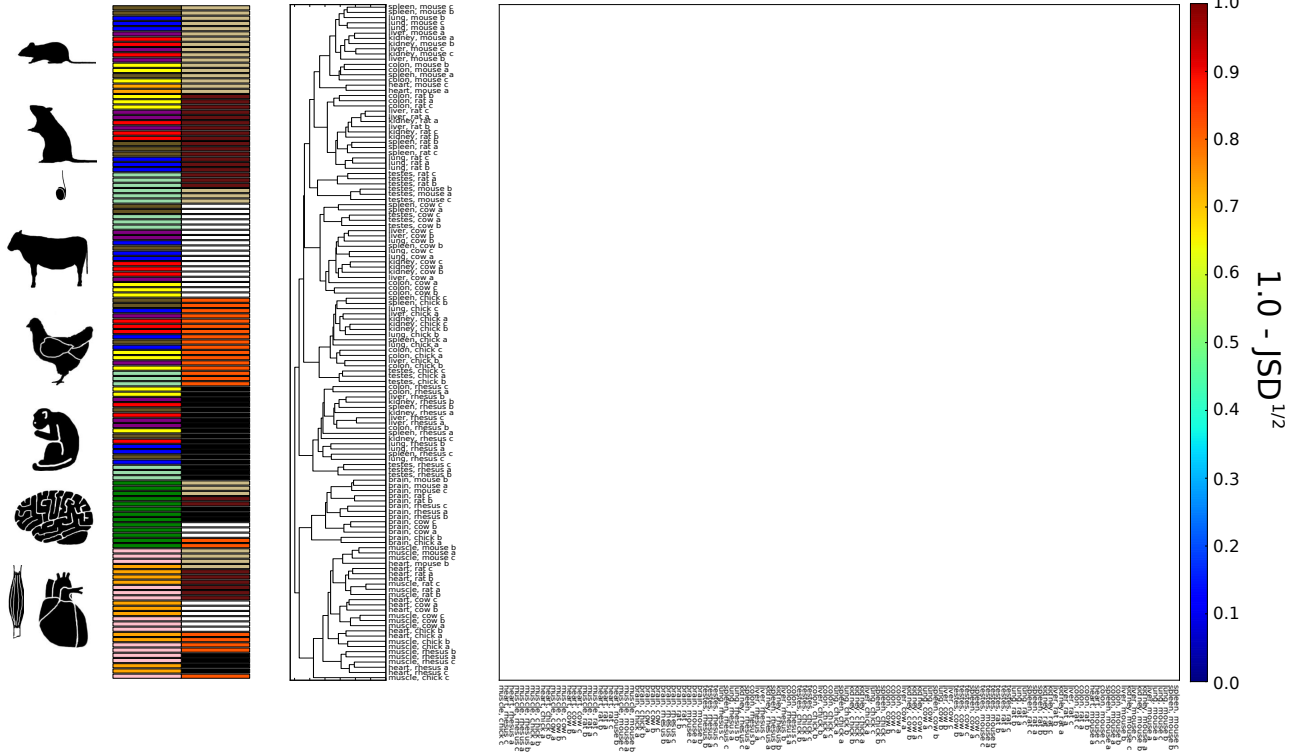

**B** min FPKM 15

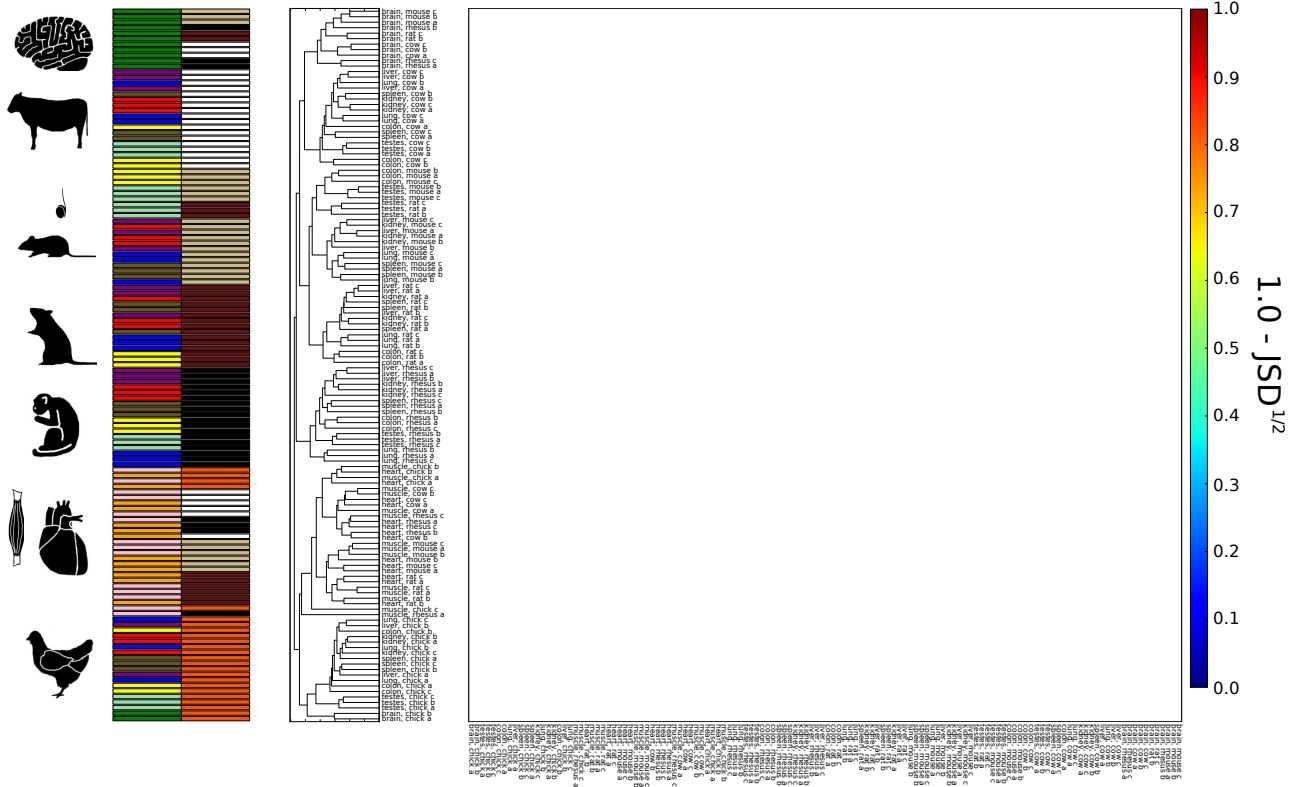

# Supplementary figure 4

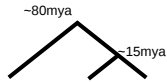

by species: ■ rhesus ■ mouse ■ rat

by tissue: ■ brain ■ colon ■ heart ■ kidney ■ liver ■ lung ■ muscle ■ spleen ■ testes

**A**

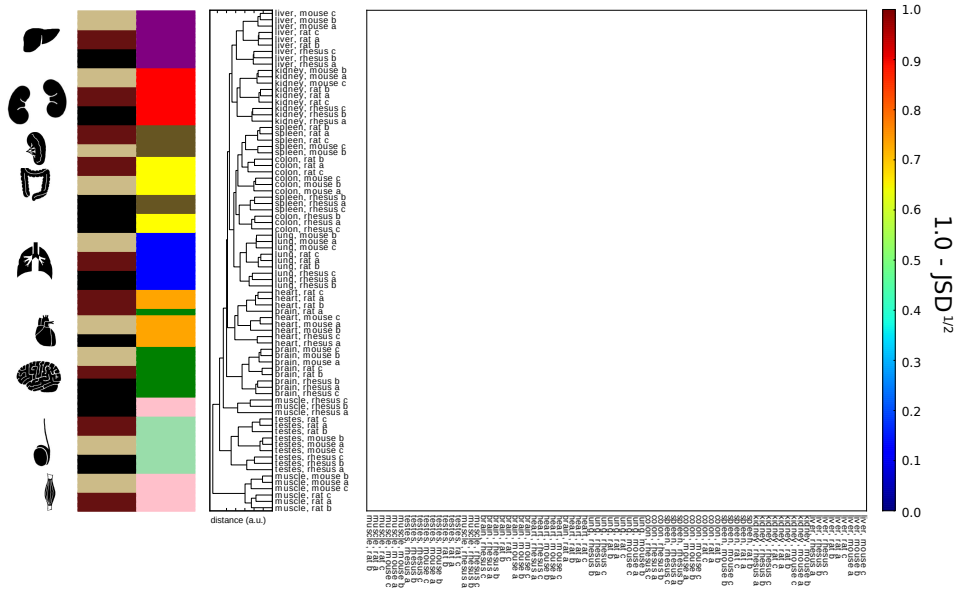

**B**

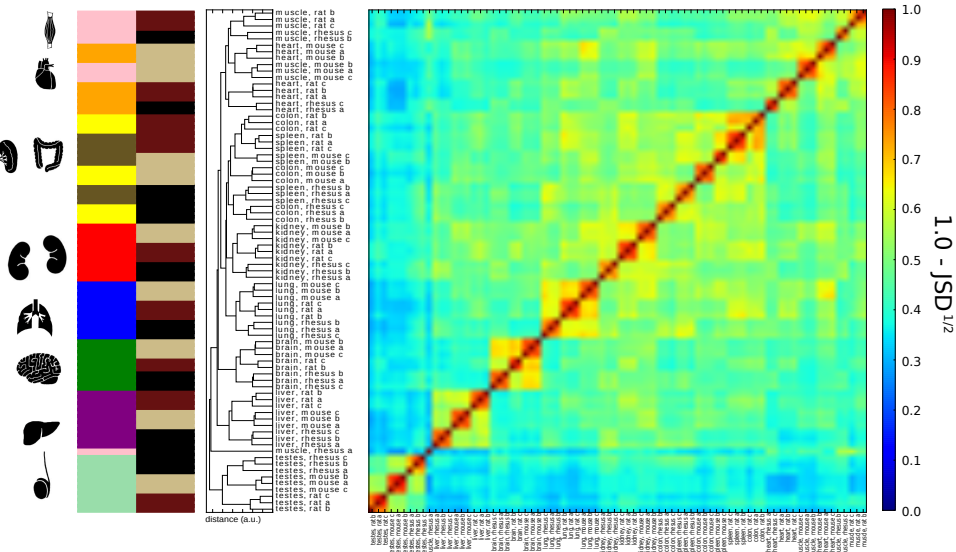

**C**

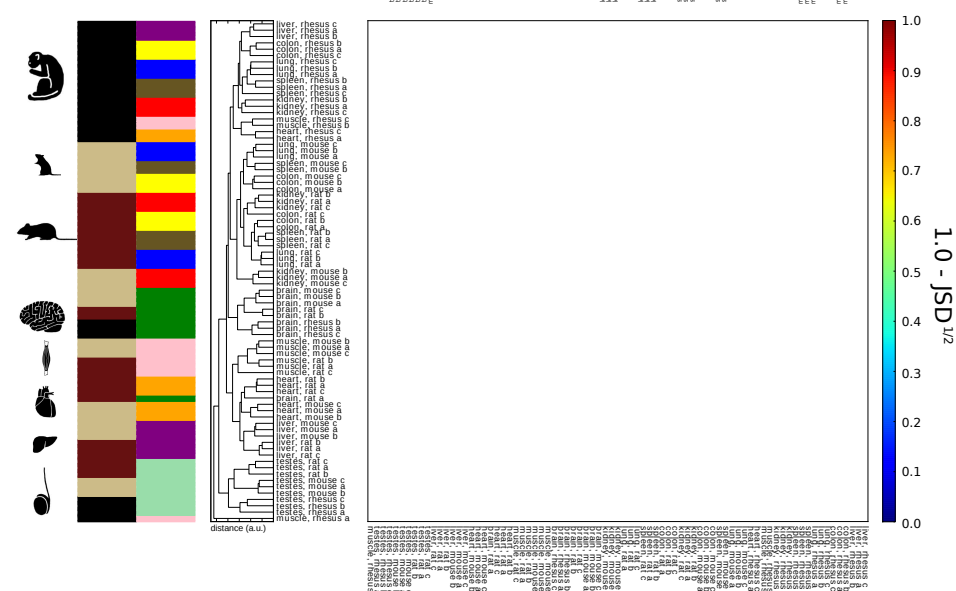

Supplementary figure 5

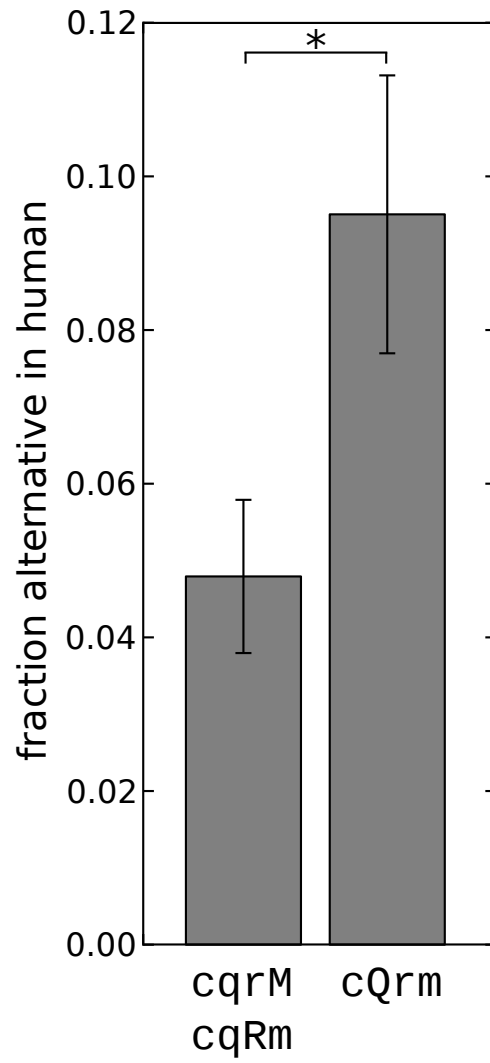

# Supplementary figure 6

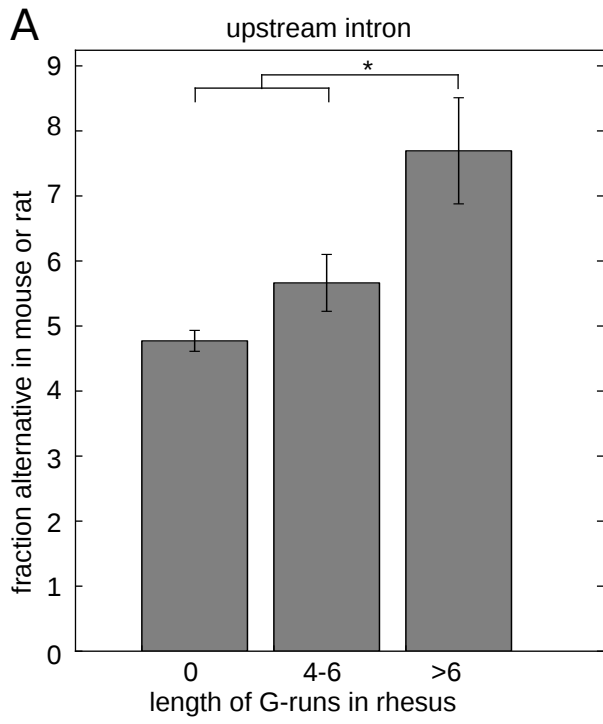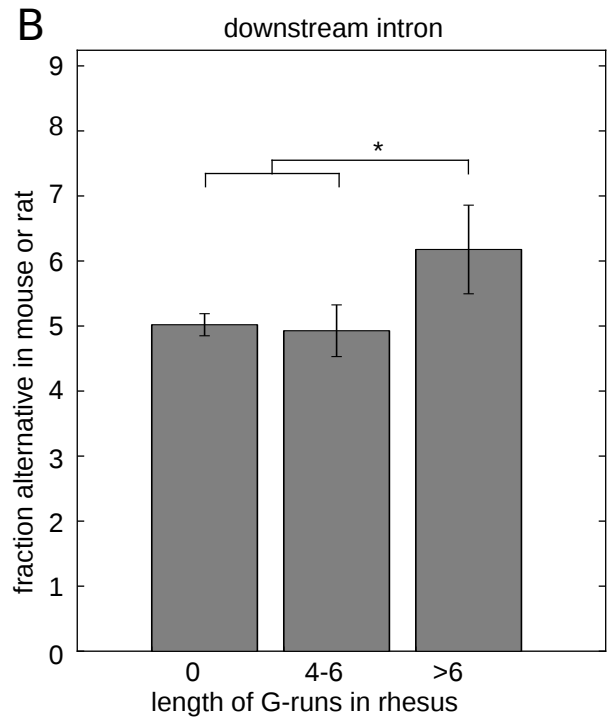

# Supplementary figure 7

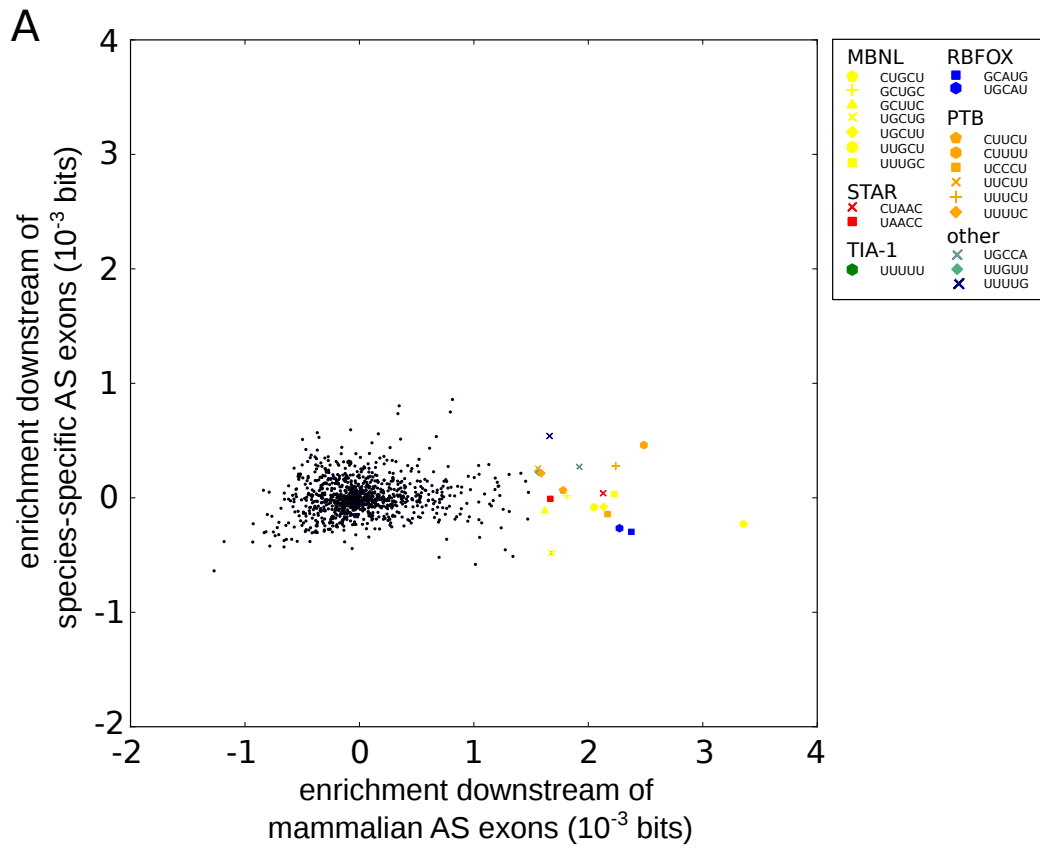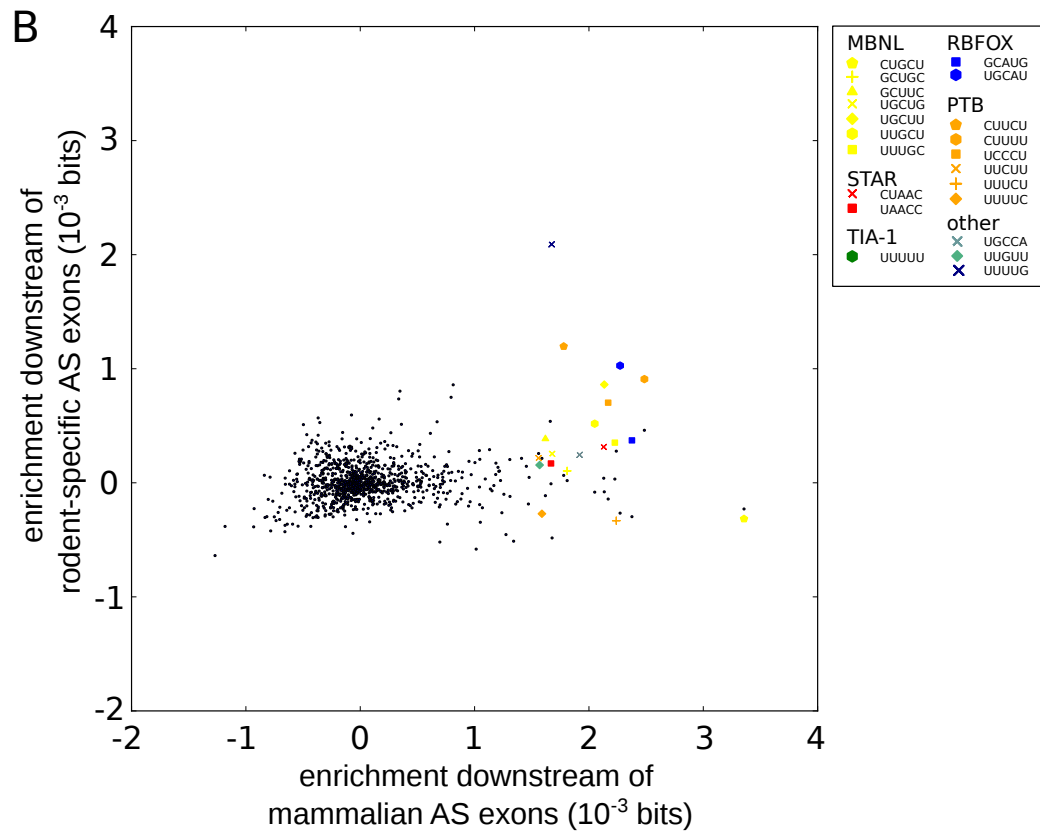

# Supplementary figure 8

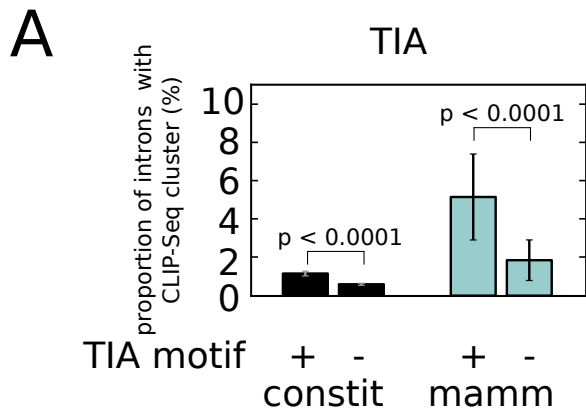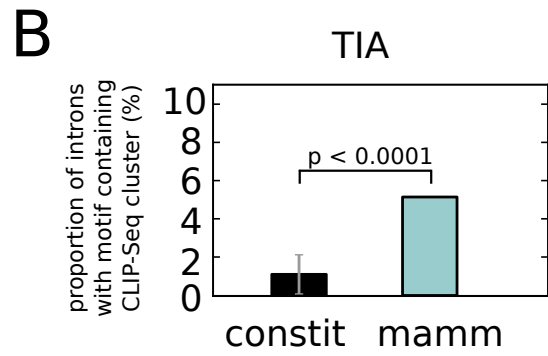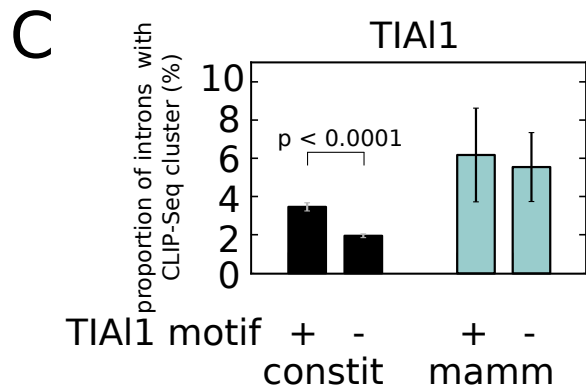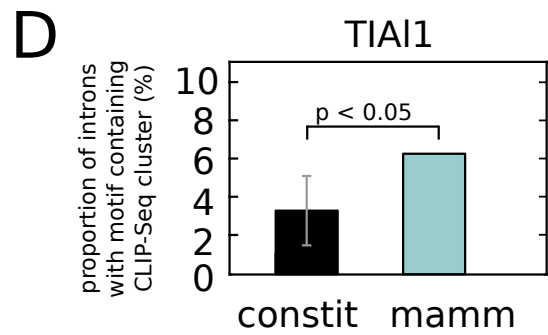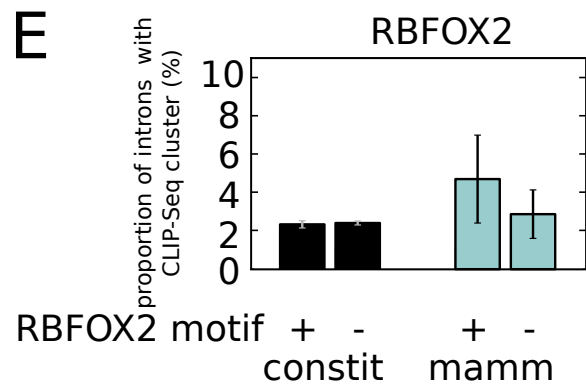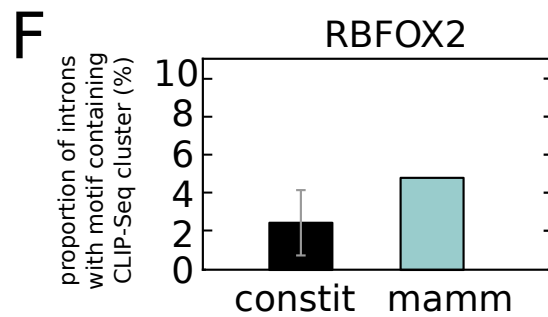



# Supplementary figure 9

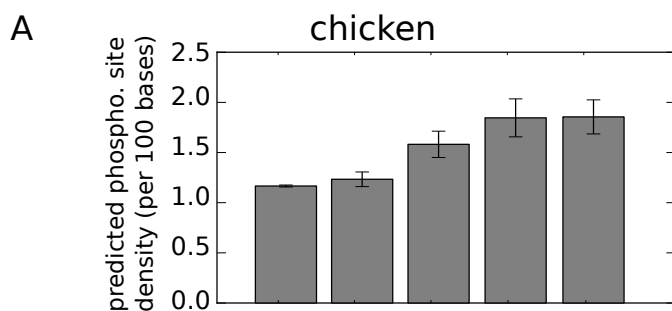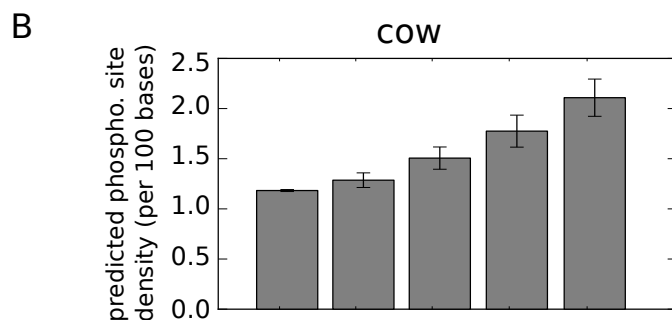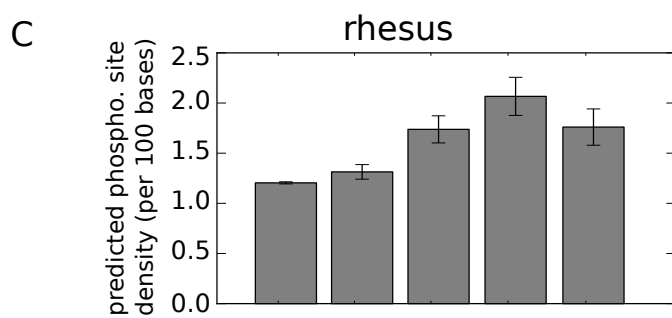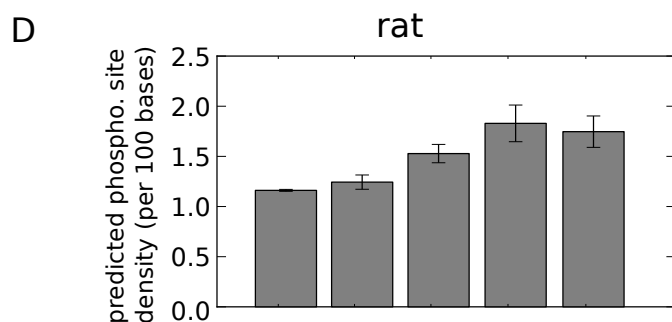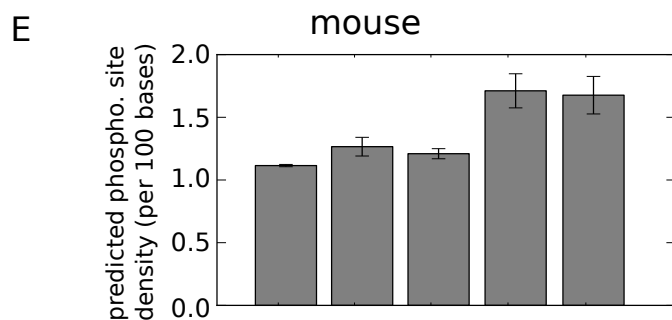

|                    |   |   |   |   |   |
|--------------------|---|---|---|---|---|
| alternative        | - | + | + | + | + |
| tissue-specific    | - | - | - | + | + |
| splicing-conserved | - | - | + | - | + |

Supplementary figure 10

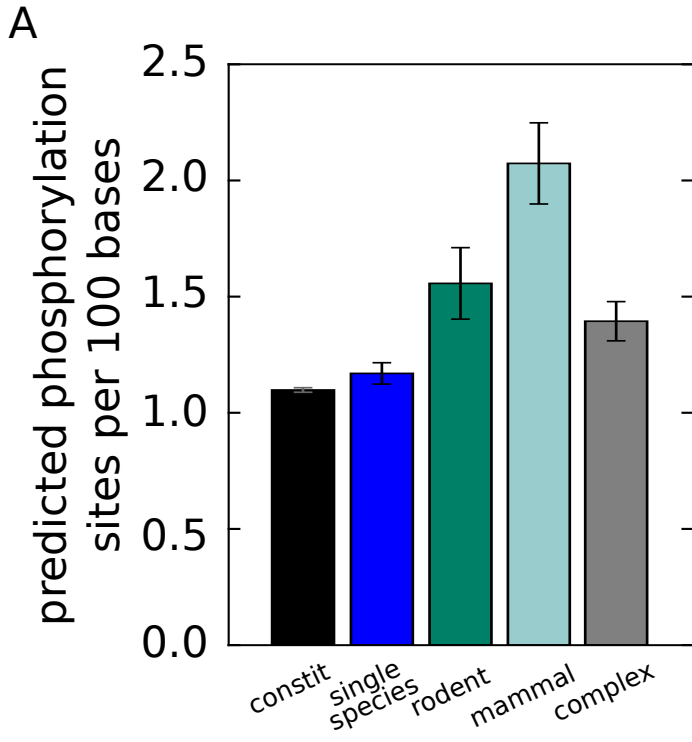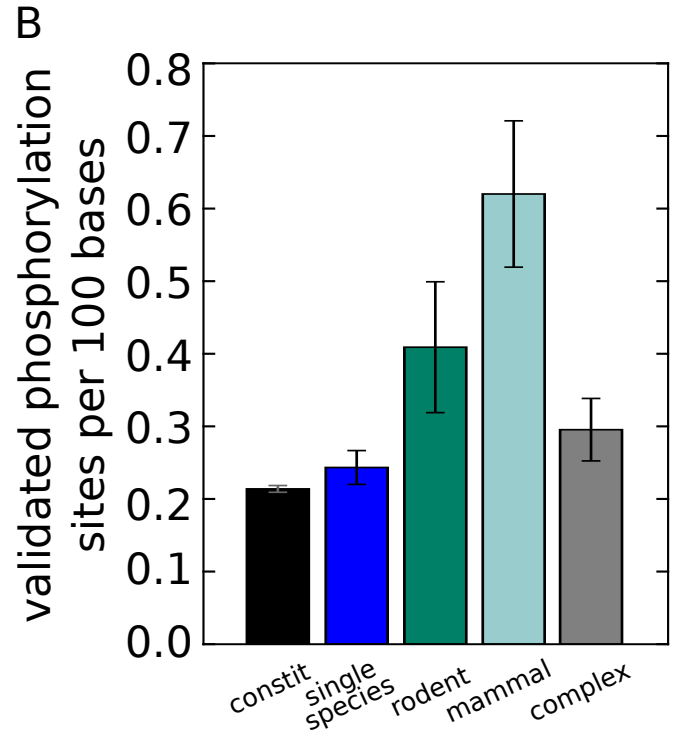

Supplementary figure 11

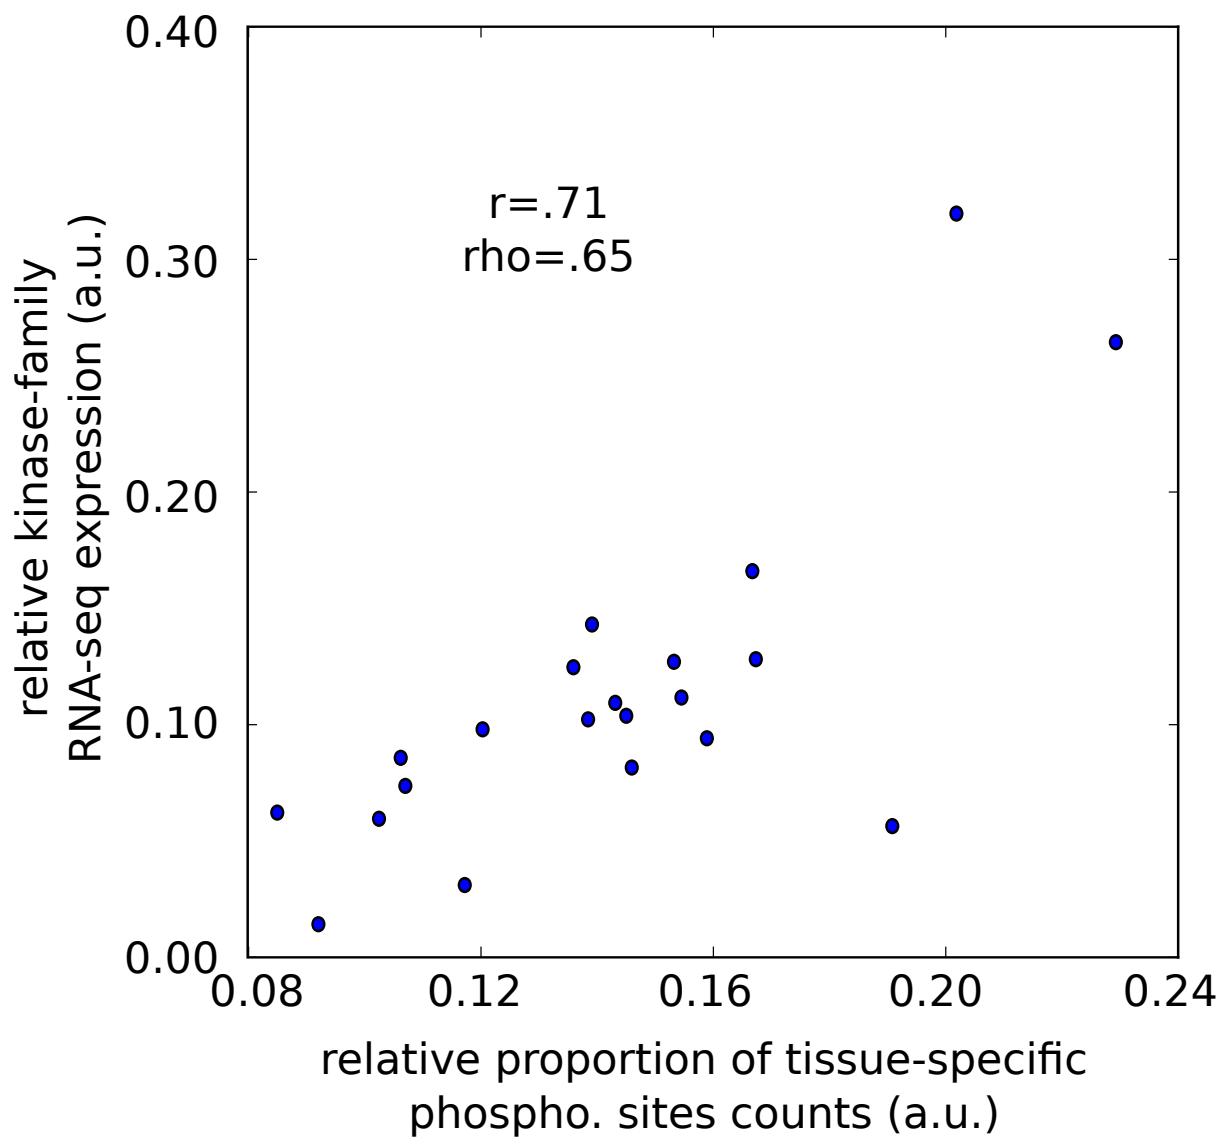

## Supplementary figure 12

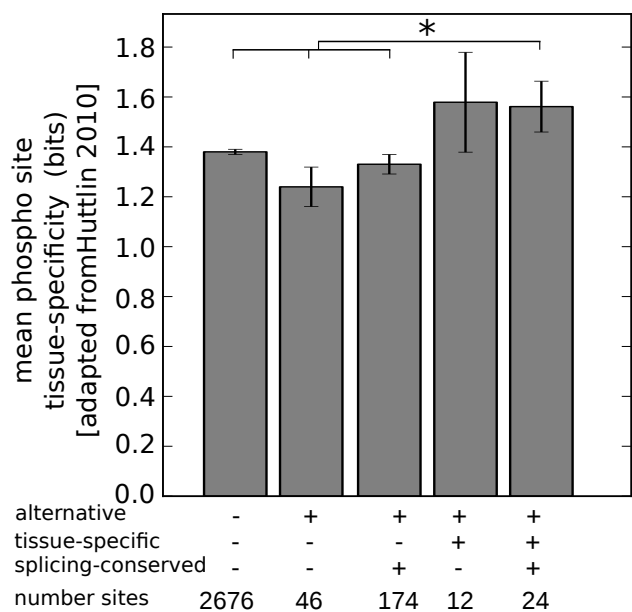

# Supplementary figure 13

## A

Clk2, KSI = 13.8%

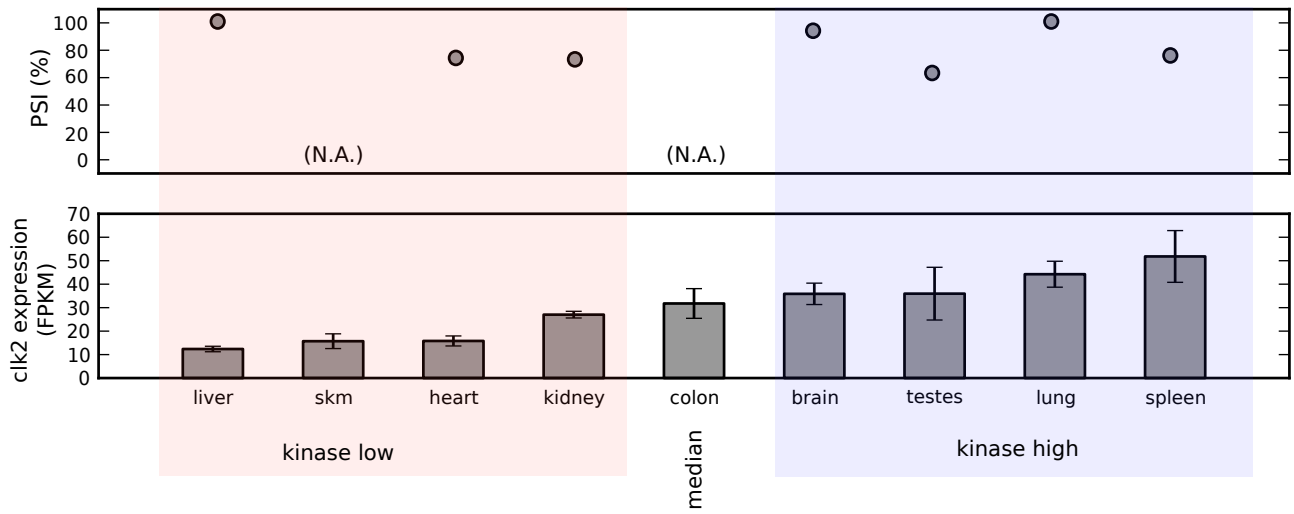

## B

Akt, KSI = 10%

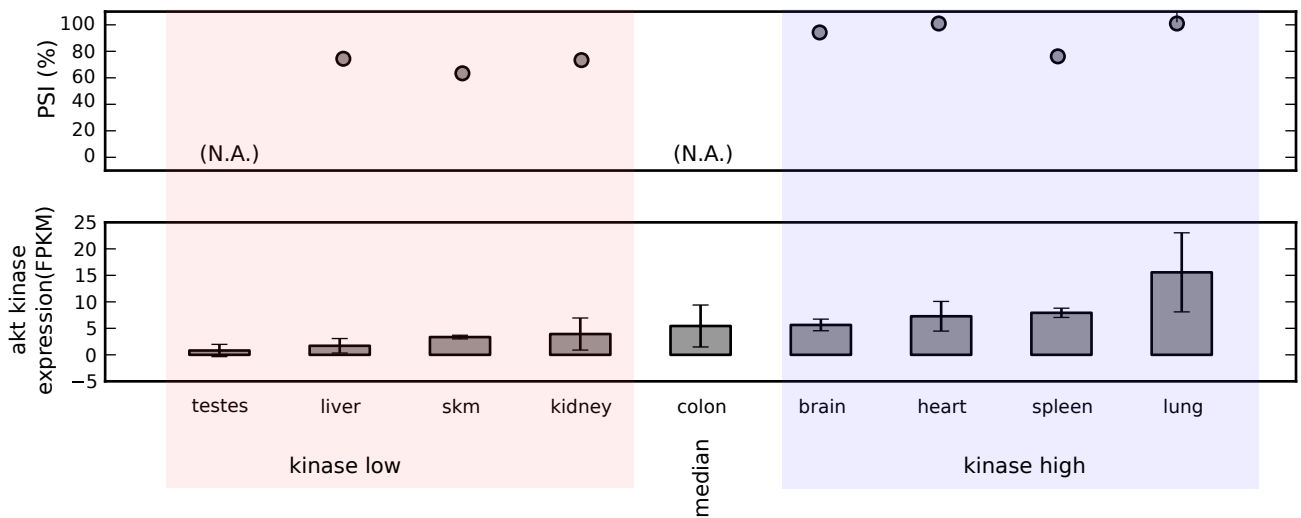



# Supplementary figure 15

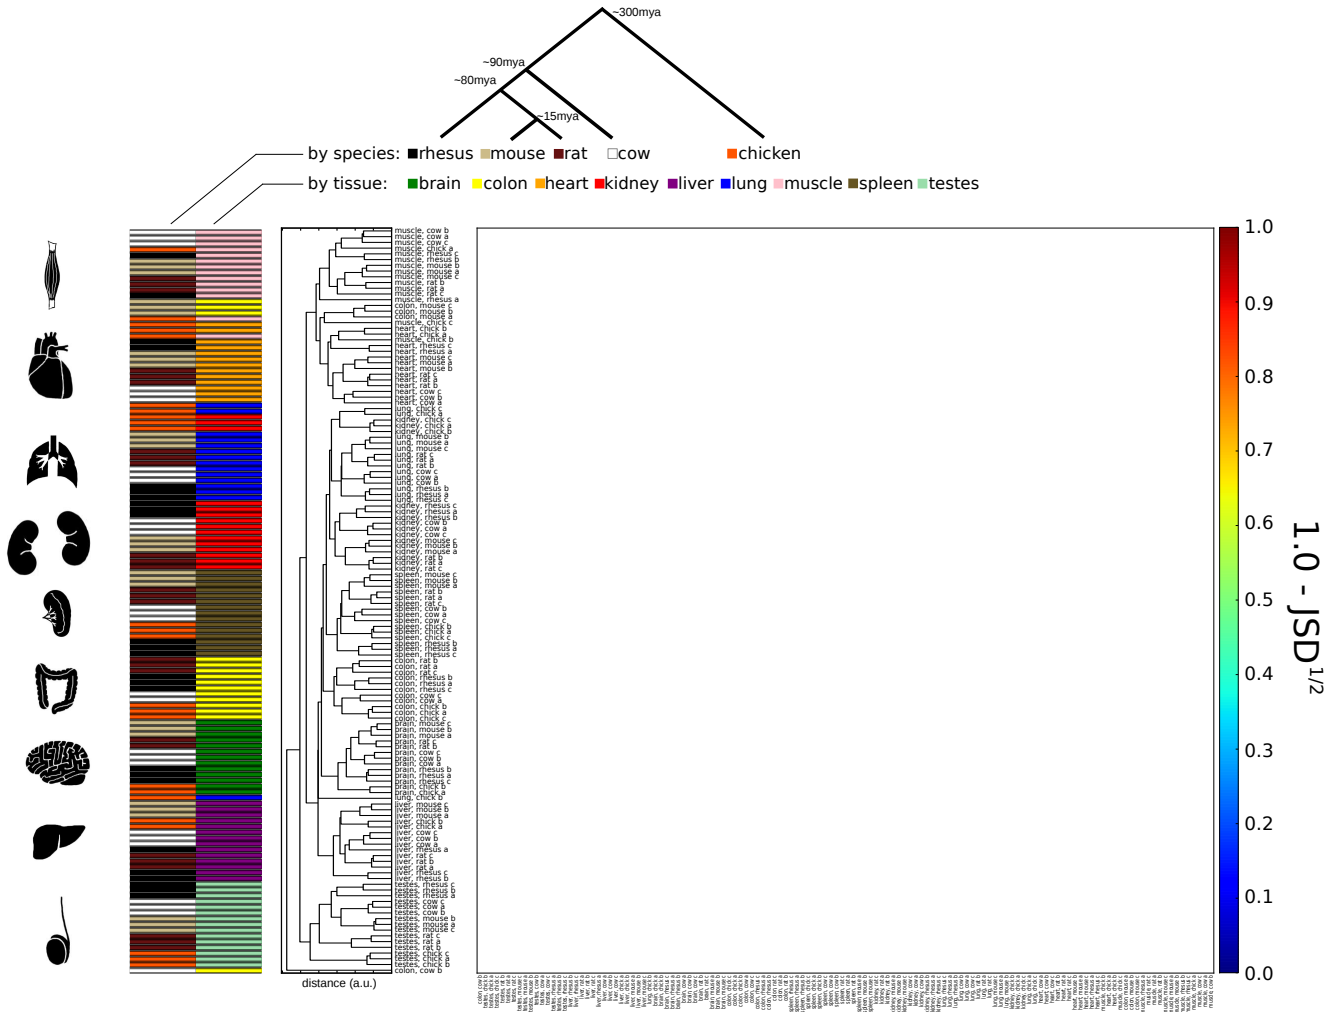

Supplement: NIHMS421590-supplement-Supp__Figs.pdf [file NIHMS421590-supplement-Supp__Figs.pdf]
